**Table S1.** Dopamine receptor primers for *H. saltator*

| Receptor          | Forward               | Reverse                |
|-------------------|-----------------------|------------------------|
| <i>Hsal-dop1</i>  | TGACGAAGCTGCCGGAC     | TGGTCGGACACGTGGTAAGG   |
| <i>Hsal-dop2</i>  | AATCTCTGGGAACTCGCGAC  | CAAAGTAATTGGTCGCTGTGTG |
| <i>Hsal-dop3</i>  | ATAGAAGAGTATGGCTGACG  | GACAGGCTCGAGTAGATG     |
| <i>Hsal-gapdh</i> | TATCAAGGCCAAGGTAAAGGA | CATACCACGAGATCAGCTTCA  |

**Table S2.** Dopamine receptor coding sequences (primer regions highlighted)

|                         |                                                                                                                                                                                                                                                                                                                                                                                                                                                                                                                                                                                                                                                                                                                                                                                                                                                                                                                                                                                                                                                                                                                                                                                                                                                                                                 |
|-------------------------|-------------------------------------------------------------------------------------------------------------------------------------------------------------------------------------------------------------------------------------------------------------------------------------------------------------------------------------------------------------------------------------------------------------------------------------------------------------------------------------------------------------------------------------------------------------------------------------------------------------------------------------------------------------------------------------------------------------------------------------------------------------------------------------------------------------------------------------------------------------------------------------------------------------------------------------------------------------------------------------------------------------------------------------------------------------------------------------------------------------------------------------------------------------------------------------------------------------------------------------------------------------------------------------------------|
| <b><i>HsalDop-1</i></b> | <p>ATGACCTTCGCCGGGGTCAACGACCTCCTCGGCTATTGGGTCTTCGGCTT<br/> GTGGTTCTGCGACATCTGGATCGCCTTCGATGTTATGTGCAGCACTGCCT<br/> CTATCCTCAATCTATGCGCCATCTCCCTCGACCGTTACATTACATTAAG<br/> GATCCCCTCAGGTACGGCCGTTGGGTGACTAGAAGAGTCGCTATCGGCGG<br/> TATCGCCGTCGTGTGGCTTTTAGCAGGACTCATATCCTTCGTACCGATCA<br/> GCCTAGATCTTCACAGGGCAGATCAACCGGCGCTCTATAATGACGGAATA<br/> GAGGAGCACCTACGTGTGCCCTAGACATTACACCCACTTACGCGTGGT<br/> GTCCTCTTGATATCTTTCTACGTGCCCTGCATCGTGATGTTGGGGATTT<br/> ATTGCAGGCTCTATTGCTACGCGCAGAAACACGTAAGGAGTATCCGAGCG<br/> G<b>TGACGAAGCTGCCGGAC</b>ACCTCCATGGCCAAGAGTTTTCGCTCCAAGAG<br/> CAGTCGCTGTAAGCCACCGAAGCCGCAACGAAGACGAAGCCGACTAGT<b>C</b><br/> <b>CTTACCACGTGTCCGACCA</b>CAAGGCCGCGATCACTGTCGGCGTAATCATG<br/> GGTGTGTTCTGATATGTTGGGTACCCTTCTTCTGCGTCAACATTGTGCG<br/> AGCCTACTGCAAACCTGCATACCTCTCCGAGCGTTCAGGTTCTCACGT<br/> GGCTCGGCTACAGTAACTCGGCCTTCAACCCGATAATCTACAGCATCTTC<br/> AACACTGAGTTCGGGAGGCGTTCAAGAGGATCCTCACGAAAGGAGCGCG<br/> CGCGAGGGGTAATCAGCCGTCGACCAGCGAATGCGGGGAGTTCCGCTCGG<br/> TGGTGGTGCAGAAACGCAACGGCTCCATGGTCGAGTGCAACATCAGTCCA<br/> AGGTCGAGCGCGGACAGCTGCCAGGTCGGCGTCATGGCTCAAAGGCATCG<br/> CGACACTATCGTCAGCGCCATATAA</p>                                                                                                                                            |
| <b><i>HsalDop-2</i></b> | <p>ATGAACGACAGCGAGATCTATTTACTGAGCTGGGAAGACGAGGTACACGC<br/> AACAAACAACGACGATCTCGGCAGGAGCTTTTACAACGCAAGCTATCCGC<br/> CGTTCAACAGCAGCTACGAG<b>AATCTCTGGGAACTCGCGAC</b>TGATCGCGCC<br/> GGACTCGCGATCGTTCTCCTGCTCTTCTCCGTAGCGACCGTCTTCGGCAA<br/> CACGCTGGTGATATTGGCGGTGTTACAGGGAACGGTACCTG<b>CACACAGCGA</b><br/> <b>CCAATTACTTTG</b>TAACTCATTGGCCTTCGCCGATTGCCTGGTCGGCCTG<br/> GTGGTGATGCCGTTACGCGCGGTTTACGAGGTGCTGGAGAACCCTGGCT<br/> CTTCACGACCGACTGGTGCGACGTGTGGCGCTCGTTGGACGATTATTCT<br/> CCACCGTCCATCCTGAATCTGTGCGTCATCAGTTTGGACCGTTACTGG<br/> GCGATCACCGATCCGTTACGATATCCGACGCGGATGAGCCGAAACGCGC<br/> GGCCATCCTCATCGCGATCGTGTGGATCTGCTCGAGCGCGATCTCCTTCC<br/> CGCGGATCGCCTGGTGGCGGGCGGTGCGGACCGAACAAGTGCCCGAGGAC<br/> AAGTGCCCGTTACAGGAGAACCCTCGGCTACCTCATCTTCTCGTCGACAAT<br/> CAGCTTCTACCTGCCGCTCTTCGTATGGTGTTCACGTATTACCGAATCT<br/> ATCGCGCCCGCGTGATACAGACGAGGAGCCTGAAGCTCGGTACGAAGCAA<br/> GTGATGATGGCCTCGGGCGAGCTCGAGCTCACTCTGAGGATACACCGGGG<br/> TGGTGGTACCAACACCGACGCCCGCCACCTCTTTCGAACCACTTCGAGCA<br/> CGCCCGAGGAGCTGCAGGATCTCGAGGAGCCGCTAACC GCGCTTACAAC<br/> AACGGTCTCACCCGGGTGCCGTCCGCGAGGCACACCATCAACAACAAGCA<br/> ACACCTCGGTAAAACTTCTCCTTGTGCGCAAGCTCGCCAAATTCGCCA<br/> AGGAGAAGAAGGCGGCCAAGACTTTGGGCATCGTCATGGGCGTCTTCATC<br/> ATCTGCTGGCTGCCGTTCTTCGTGCTGAATCTATGGTCGGGATTCTGCAC</p> |

|                 |                                                                                                                                                                                                                                                                                                                                                                                                                                                                                                                                                                                                                                                                                                                                                                                                                                                                                                                                                                                                                                                                                                                                                                                                                                                                                                                                                                                                                                                                      |
|-----------------|----------------------------------------------------------------------------------------------------------------------------------------------------------------------------------------------------------------------------------------------------------------------------------------------------------------------------------------------------------------------------------------------------------------------------------------------------------------------------------------------------------------------------------------------------------------------------------------------------------------------------------------------------------------------------------------------------------------------------------------------------------------------------------------------------------------------------------------------------------------------------------------------------------------------------------------------------------------------------------------------------------------------------------------------------------------------------------------------------------------------------------------------------------------------------------------------------------------------------------------------------------------------------------------------------------------------------------------------------------------------------------------------------------------------------------------------------------------------|
|                 | GAGGTGCATCTGGCAGGAAGAGATAGTATCCGCGGCCGTCACATGGCTCG<br>GTTGGATTAATAGTGAATGAATCCCCTGATATACGCTTGCTGGAGCAGG<br>GACTTCCGTAGGTGA                                                                                                                                                                                                                                                                                                                                                                                                                                                                                                                                                                                                                                                                                                                                                                                                                                                                                                                                                                                                                                                                                                                                                                                                                                                                                                                                           |
| <b>HsaDop-3</b> | GTGTTTCTGCAGGTGAACGGATCTTGGAGTCTGCCTGGATTTGTTTGTGA<br>CTTTTACATCGCAATGGATGTGACTTGCAGTACCAGCTCCATATTC AAC<br>TCGTGGCTATTTCCATAGACAGATACATAGCGGTGACCCAGCCGATAAAG<br>TACGCGAAGCACAAGAACAATAGAAGAGTATGGCTGACGATACTGTTGGT<br>CTGGGCGATATCGGCCGCGATCGGCAGCCCGATTGTCCTAGGCTTGAATA<br>ACACCCCGACCGGATACCGGACCAATGTCTGTTCTACAATACGGATTTT<br>ATCATCTACTCGAGCCTGTCCAGCTTCTACATACCCTGCATCATCATGGT<br>ATTCTCTATTATAATATATTCAAGGCTCTGCGAAATAGAGCGGAGAAGGG<br>CTCGTGCTAGCAAAAAACCGAATTTAGGCGATATAAAACCGGGAAGCATC<br>ATCGAGAACATCGCACACACGCGCAGGTTTGCAGAAACGGCGTTGGGGGC<br>GGCCGCCTTAGTGGCTCCTGGAATCGAGGAACCGACAAACACCGCTTCCG<br>GCAGCAATGAGGACGAGGACGAGACACCCCTCGATCCCGTCGTCTCATC<br>TCCAACGACAAGAGCACGGAATTTCTTTCTGGCCACGGTCGTTCGAGGAAGC<br>AGCCGCGGTGGCGCAAGCCAGCTGAGCGGGACGCCCCACGTTTCGCAAAG<br>ATTCCGTTACGACGGCGCGGCGAGCAGCACGATGATCCACGAACCCCTC<br>GAGACGAATTCCAGCCCGAGCCCGAACCCGCGGATCACCTCGGCTCCGTC<br>GTCGTGACCTCGTCGTGCGCGCCGCGGACGAGAGGTGCGACCAGCGTCT<br>CGTCGCAGACGAAGAAGAACGGCAACGGCAGCACGAACAAGCAGGAGCTC<br>AAGAGACTGAAGAGTGCCGGCTCGCTATTGCCGCTGCAGCTCGCGAGGAC<br>GCCAGCGTGCTGTCGTCCGCGGCAAGAAGGACCGCAAGAAGCCTCGG<br>CCGGGTCAAGGTTACGATATAAAGGCCAACAAGGCCAGAAAAAGAAG<br>AGAGAGAAGAGTTCGGCCAAGAAGGAGCGCAAGGCCACGAAGACTCTAGC<br>GATCGTGTTAGGGGTCTTTCTGATATGCTGGGTACCCTTCTTACCTGCA<br>ACATCATGGATGCAATCTGCACGAACTGACGAAGGCCTGTCAGCCTGGT<br>GTTACAGCTTTTATCATCACCTCCTGGTTGGGTTATATGAACAGCTTTGT<br>GAATCCCGTAATATACACTGTGTTCAACCCCGAGTTCGCAAGGCCTTCC<br>GCAAGTTGATCAGCGTGTA |

**Table S3.** Dopamine receptor protein sequences

|                 |                                                                                                                                                                                                                                                                                                                                                                                                                                     |
|-----------------|-------------------------------------------------------------------------------------------------------------------------------------------------------------------------------------------------------------------------------------------------------------------------------------------------------------------------------------------------------------------------------------------------------------------------------------|
| <b>HsaDop-1</b> | MTFAGVNDLLGYWVFLWFCDIWIAFDVMCSTASILNLCASLDRYIHIKDPLRYGRWV<br>TRRVAIGGIAVVWLLAGLISFVPISLDLHRADQPALYNDGIEEHPTCALDITPTYAVVSSC<br>ISFYVPCIVMLGIYCRLYCYAQKHVRSIRAVTKLPDTSMAKSFRSKSSRCKPPKPKTKT<br>KPTSPYHVSDHKAITVGVIMGVFLICWVPPFCVNIVAAYCKTCIPLRAFQVLTWLGYSN<br>SAFNPIIYSIFNTEFREAFAKRILTKGARARGNQPSTSECGEFRSVVVQKRNGSMVECN<br>SPRSSADSCQVGVMAQRHRDTIVSAI                                                                               |
| <b>HsaDop-2</b> | MNDSEIYLLSWEDEVHATNNDLGRSFYNASYPPFNSSYENLWELATDRAGLAIVLLLF<br>SVATVFGNTLVILAVFRERYLHTATNYFVTSLAFADCLVGLVMPFSAVYEVLNRWLF<br>TTDWCWVWVSLDVLVSTASILNLCVISLDRYWAIDPFTYPTMRMSRKRAAILIAIWWICSS<br>AISFPAIAWWRVVRTEQVPEDKCPFTENLGYLIFSSTISFYLPFVVMVFTYYRIYRAAVIQ<br>TRSLKLGTKQVMMASGELELTRIHRGGGTNTDARHLFRSSTPEELQDLEELTALH<br>NGLTRVPSARHTINNKQHLGKNFSLSRKLAKFAKEKKAAKTLGIVMGVFIICWLPFFV<br>NLWSGFCTRCIWQEEIVSAAVTWLGWINSGMNPVIYACWSRDFRR |
| <b>HsaDop-3</b> | VFLQVNGSWSLPGFVCFYIAMDVTCSTSSIFNLVAISIDRYIAVTQPIKYAKHKNNRRV<br>WLTILLVWAISAAIGSPIVLGNNTDPRIPDQCLFYNTDFIYSSLSSFYIPCIIMVFLYYNIF<br>KALRNRRARRARASKKPNLGDIKPGSIIENIAHTRRFAETALGAAALVAPGIEEPTNTASG<br>SNEDEDETPLDPVVVISNDKSTEFFLATVVEEAAVAQAQLSGTPHVRKDSGYDGAAS<br>STMIHEPLETNSSPSNPRIITSAPSSSTSSSPPPTRGATSVSSQTKKNGNGSTNKQEL                                                                                                           |

|  |                                                                                                                                                    |
|--|----------------------------------------------------------------------------------------------------------------------------------------------------|
|  | KRLKSAGSLLPLQLARTPSVLSSAGKKDRKNASAGSRFTIYKANKASKKKREKSSAKKE<br>RKATKTLAIVLGVFLICWVPFFTCNIMDAICTKLTACQPGVTAFIITSWLGYMNSFVNPV<br>IYTVFNPEFRKAFRKLISV |
|--|----------------------------------------------------------------------------------------------------------------------------------------------------|
